# Supplementary material for: Structural and biochemical studies of SLIP1–SLBP identify DBP5 and eIF3g as SLIP1-binding proteins
Source: PubMed Central journal article supplement — Nucleic Acids Res. 2013 Jun 25;41(16):7960–71. doi: 10.1093/nar/gkt558 (PMC3763545; doi:10.1093/nar/gkt558), 2013-06-25

## Supplementary Figure 1

### Determinants and conservation of the SLIP-DBP5 interaction

Quantitative measurements of the interaction between *H.s.* SLIP1 and f.l. *H.s.* DBP5 (panel A), *H.s.* SLIP1 and the RecA-domain region of DBP5 (panel B) and of *D.r.* SLIP1 with the SBM-containing region of *D.r.* DBP5 (panel C). Both the raw data and the integrated heat data are shown.

## Supplementary Figure 2

### SLIP1 dimerization in solution and in the crystal lattice

- A) Static light scattering analysis of purified human f.l. SLIP1. One SLIP1 monomer has a calculated molecular weight (MW) of 25423 Da. The expected MW for the SLIP1 dimer is 50846 Da. Static light scattering experiments were performed on a Superdex 200 columns (5/150) coupled to a static light scattering device (TDA302, Viscotek) with a triple detector array and result in a MW of 46486 Da, supporting a homodimeric arrangement.
- B) Superposition of the SLIP1 dimers of the apo form in grey (pdb 2I2O, spacegroup C2) and in the DBP5 bound form (SLIP1 monomers in yellow and orange, DBP5 SBM in blue and light blue, spacegroup P6<sub>1</sub>22).

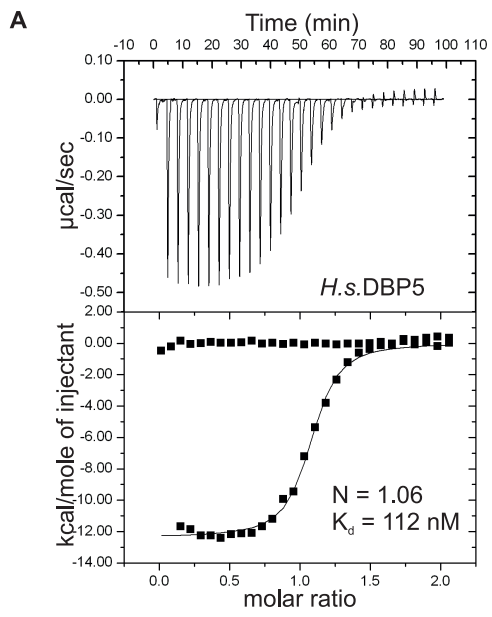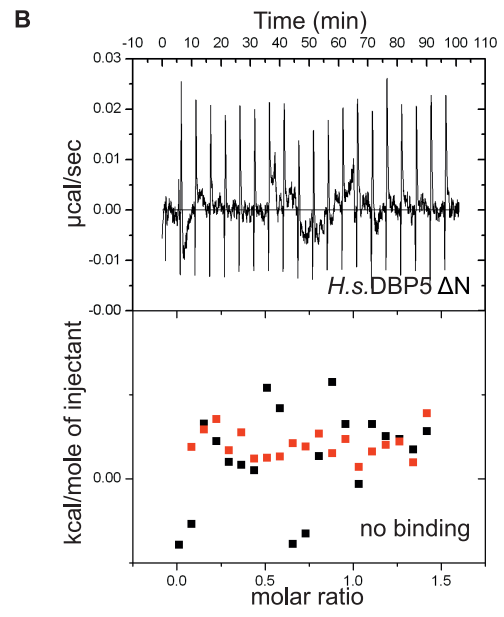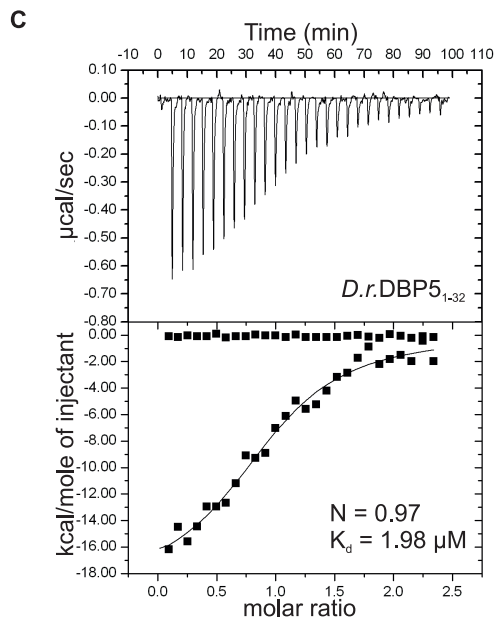

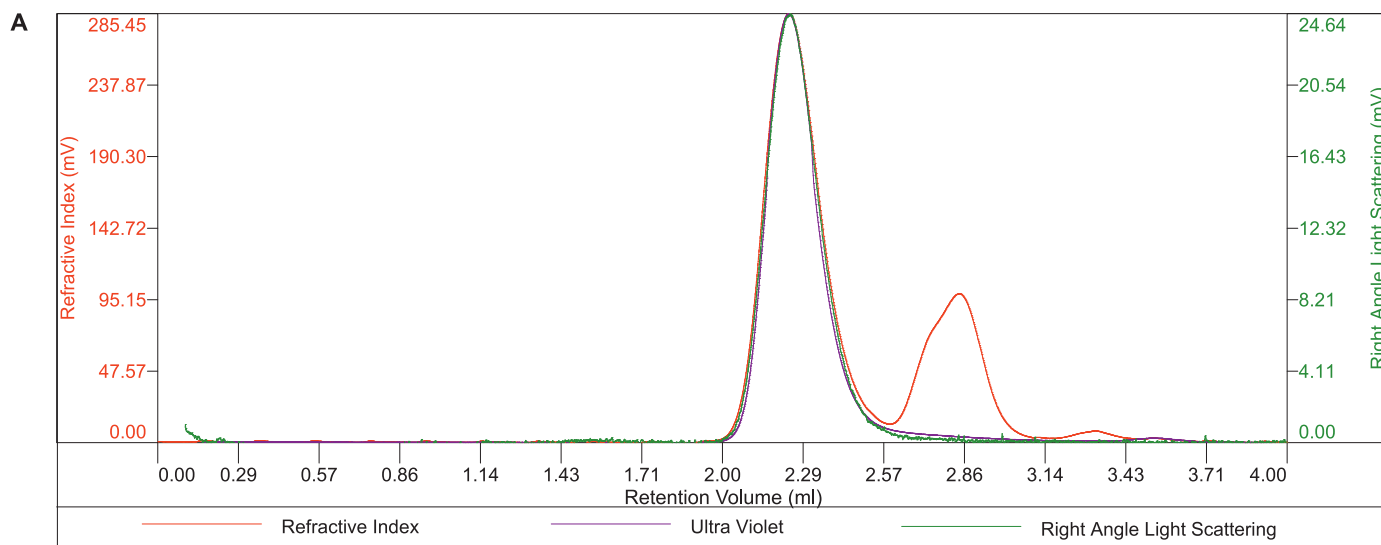

|                             |             |
|-----------------------------|-------------|
| ID                          | SLIP1       |
| concentration [mg/ml]       | 3.17        |
| recovery                    | 126.89      |
| dn/dc                       | 0.185       |
| column                      | Superdex200 |
| flow rate [ml/min]          | 0.2         |
| injection volume [ $\mu$ l] | 10          |
| vol. inc.                   | 0.0007      |
| column temp [°C]            | 24          |
| peak                        | 1           |
| ret. vol.                   | 2.234       |
| Mh                          | 45.333      |
| Mw                          | 46.486      |
| Mz                          | 47.341      |
| Mp                          | 52.132      |
| Mw/Mh                       | 1.025       |
| RI area                     | 67.53       |

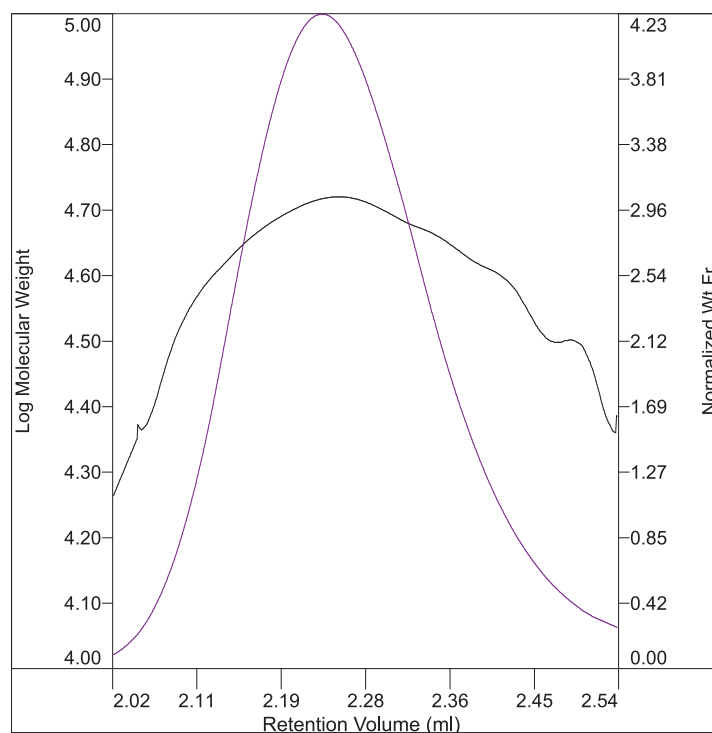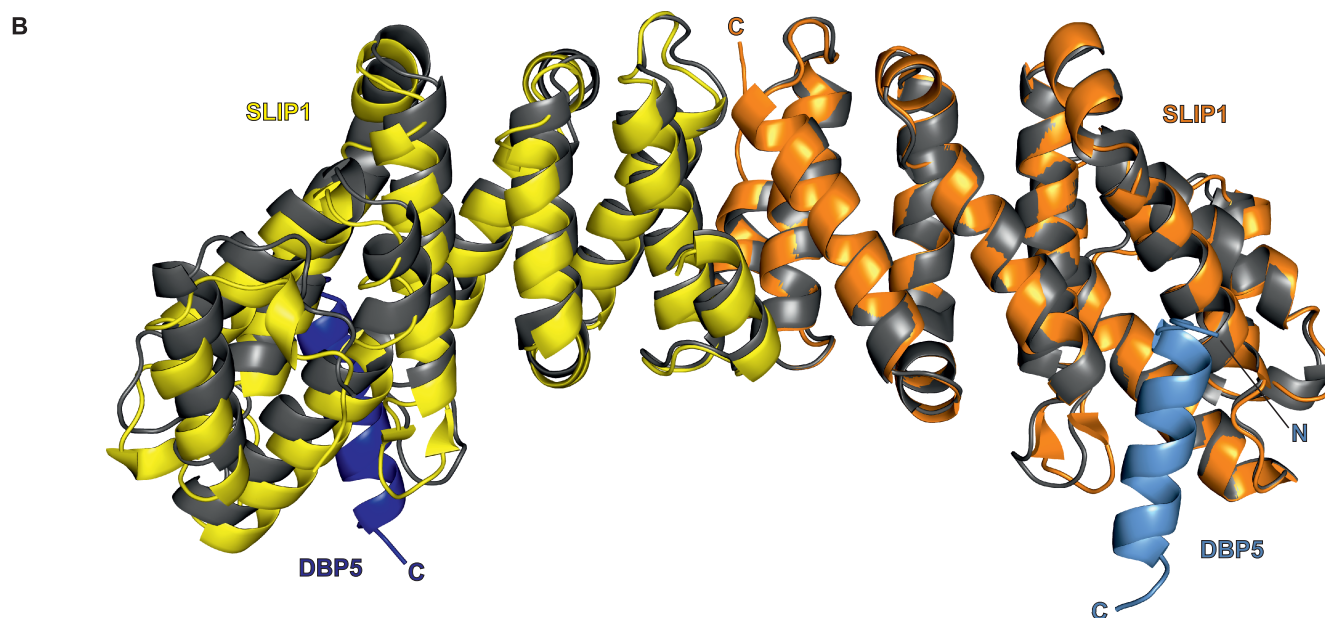

Supplement: supp_gkt558_nar-00676-r-2013-File009.pdf [file supp_gkt558_nar-00676-r-2013-File009.pdf]
